## Forensic genomics of novel *Klebsiella* strain

### Forensic genomics of a novel *Klebsiella quasipneumoniae* type from an NICU in China reveals patterns of genetic diversity, evolution and epidemiology

Laura Perlaza-Jiménez<sup>1,2</sup>, Qing Wu<sup>1</sup>, Von Vergel L. Torres<sup>2</sup>, Xiaoxiao Zhang<sup>3</sup>, Jiahui Li<sup>1</sup>, Andrea Rocker<sup>2</sup>, PhD., Trevor Lithgow<sup>2,\*</sup>, Tieli Zhou<sup>1,\*</sup>, Dhanasekaran Vijaykrishna<sup>1,2,\*</sup>

<sup>1</sup>The First Affiliated Hospital of Wenzhou Medical University, Wenzhou, China

<sup>2</sup> Monash University, Victoria, Australia

<sup>3</sup> Women's Hospital School of Medicine Zhejiang University, Hangzhou, China

Correspondence:

[vijay.dhanasekaran@monash.edu](mailto:vijay.dhanasekaran@monash.edu)

[trevor.lithgow@monash.edu](mailto:trevor.lithgow@monash.edu)

[wyztli@163.com](mailto:wyztli@163.com)

#### Keywords:

*Klebsiella quasipneumoniae* subsp. *similipneumoniae*; genetic diversity; virulence determinants; antimicrobial resistance

#### Data summary:

Genome sequences generated in this study are available in NCBI under BioProject ID PRJNA610124. All bioinformatic protocols used to process the genomic data are available at [https://github.com/vjlab/KpIIB\\_ST2727](https://github.com/vjlab/KpIIB_ST2727).

1 **ABSTRACT**

2 During March of 2017 a neonate patient suffered severe diarrhea and subsequently  
3 developed septicemia and died, with *Klebsiella* isolated as the causative microorganism.  
4 Coincident illness of an attending staff member and three other neonates with *Klebsiella*  
5 triggered a response, leading to a detailed microbiological and genomics investigation of  
6 isolates collected from the staff member and all 21 co-housed neonates. Multilocus  
7 sequence typing and genomic sequencing identified that the *Klebsiella* from all 21  
8 neonates was a new MLST ST2727, and belonged to a less frequently detected  
9 subspecies *K. quasipneumoniae* subsp. *similipneumoniae* (KpIIB). Genomic  
10 characterization showed that the isolated ST2727 strains had diverged from other KpIIB  
11 strains at least >90 years ago, whereas the neonate samples were highly similar with a  
12 genomic divergence of 3.6 months and not related to the staff member, indicating that  
13 transmission did not occur from staff to patient or between patient to patient, but were  
14 acquired from a common hospital source. The genomes revealed that the isolates  
15 contained the ubiquitous *ampH* gene responsible for resistance to penicillin G, cefoxitin  
16 and cephalosporin C, and all Kp-IIB strains were competent for host cell adhesion. Our  
17 results highlight the clinical significance and genomic properties of relatively mild, but  
18 persistent MLST types such as ST2727, and urges for genomic surveillance and  
19 eradication within hospital environments.

## 20 INTRODUCTION

21 Species of *Klebsiella* are widespread in the environment, found in soil and  
22 ground-water, as commensal organisms on plants and are carried widely in animal hosts  
23 (1). *Klebsiella pneumoniae*, is recognized as a leading cause of healthcare-associated  
24 urinary tract infections, surgical site infections and pneumonia, increasingly threatening  
25 neonates and the immunocompromised (2). However, in recent times, an increasing  
26 diversity of *Klebsiella* species have been identified to cause infection in humans (3, 4).  
27 Genome sequencing has revealed that bacteria historically classified as *K. pneumoniae*  
28 belonged to the *K. pneumoniae* species complex containing multiple phylogenetically  
29 distinct but closely related bacterial species. These include *K. pneumoniae* (previously  
30 classified as phylogroup KpI), *K. quasipneumoniae* (subsp. *quasipneumoniae* (KpIIA)  
31 and subsp. *similipneumoniae* (KpIIB)), *K. variicola* (KpIII) (5), and two strains forming  
32 divergent lineages indicating potentially novel species within this species complex (6).  
33 Whole genome sequencing (WGS) has shown that the predominant cause of clinical  
34 infection worldwide has been due to KpI (5), although there is an increasing trend, and  
35 increasing concern, in the detection of severe cases due to the newly described species  
36 (7). Different studies report *K. quasipneumoniae* isolates causing infections resistant to  
37 treatments with ceftazidime and other oxyimino-betalactam antibiotics, and presenting  
38 carbapenemase (KPC) genes (3, 4, 8-11).

39 Due to the emergence of a greater diversity of *Klebsiella* causing severe  
40 infections, their ability of colonizing environmental niches such as sinks and ventilators  
41 in hospitals (12), and increased detection of hybrid strains with drug resistant and  
42 hypervirulent phenotypes, especially in regions such as China where the earliest reports  
43 of hvKp were observed about three decades ago (13), an early warning system for the  
44 detection of *Klebsiella* species is promoted in hospitals in China (14). Routine  
45 surveillance is conducted using Multilocus Sequence Typing (MLST), followed by  
46 antimicrobial and virulence testing providing an avenue to investigate potential outbreaks  
47 and develop better control health measures.

48           Here we report a retrospective study of an incident that occurred in March 2017,  
49 in the NICU of a major hospital with >3000 beds in China. A neonate patient suffered  
50 severe diarrhea and subsequently developed septicemia and died, with *Klebsiella* isolated  
51 as the causative microorganism from a blood sample. During the same period, severe  
52 symptoms of diarrhea were found in three other neonate patients as well as an attending  
53 NICU staff member, triggering a response to quell the apparent outbreak. In addition to  
54 intensified hygiene procedures, the response included MLST and microbiological AMR  
55 screening of stool samples from patients (21 neonates) and the staff member. Preliminary  
56 microbiological characterization of the samples revealed that 20 of the isolates taken  
57 from the infants belonged to a new MLST designation ST2727 and one infant was  
58 infected with ST477. The sample from the staff member was of ST23 type, a well-  
59 defined hypervirulent clonal group frequently detected in severe cases of infection,  
60 whereas little was known of ST2727 and ST477. To forensically dissect the details of this  
61 case, we generated whole genome data for all bacterial isolates and carried out a detailed  
62 genomic characterization of virulence and antimicrobial resistance. Using a globally  
63 sampled dataset comprising 3611 genomes we elucidate their genetic diversity, evolution  
64 and epidemiology illuminating elements of nosocomial *Klebsiella* transmission and  
65 ecological colonization that impact generally on understanding hospital-acquired  
66 infections.

## 67 **METHODS**

### 68 **Collection of clinical isolates and clinical data**

69 *Klebsiella* was isolated from the blood sample taken prior to death of a neonate,  
70 and stool samples were collected from all 21 infants in the NICU and a staff member that  
71 suffered an episode of enteritis. These isolates were characterized using a Vitek II system  
72 (bioMérieux, Marcy l'Etoile, France). Relevant clinical characteristics of the patients and  
73 staff were extracted from their medical records, including demographic characteristics,  
74 underlying medical conditions, clinical manifestations, treatments and outcomes. This  
75 retrospective study was designed in accordance with the Declaration of Helsinki, 2013  
76 (15) and been approved by the First Affiliated Hospital of Wenzhou Medical University  
77 (China).

### 78 **Molecular genotyping and sequence typing of isolates**

79 Bacterial isolates were characterized by pulsed-field gel electrophoresis (PFGE)  
80 after digestion of genomic DNA samples with XbaI under the following conditions:  
81 temperature 14°C, voltage 6 V/cm, pulse angle 120°, and pulse duration of 5-35 seconds  
82 for 18h, using a well-characterized XbaI digest (Takara Bio, Inc. Japan) of *Salmonella*  
83 *enterica* serotype H9812 as molecular marker. DNA digest patterns were analysed and  
84 interpreted according to Tenover *et al.* (16). Multilocus sequence typing (MLST) was  
85 carried out by PCR amplifying seven housekeeping genes: *gapA*, *infB*, *mdh*, *pgi*, *phoE*,  
86 *rpoB* and *tonB* (17), and the data used to assign sequence types (STs) using the Institute  
87 Pasteur MLST database (<https://bigsd.b.pasteur.fr/>). Through this process, the new  
88 ST2727 was established. Additionally, a standard multiplex-PCR was used to confirm  
89 that the isolates did not contain any of the five virulent extracellular polysaccharide  
90 capsules (CPS) (K antigen status; K-type) K1, K2, K20, K54 and K57.

### 91 **Bacterial genome sequencing and assembly**

92 DNA was extracted using a Biospin Bacterial Genomic DNA extraction kit  
93 (Hangzhou Bioer Technology Co. Ltd.). Libraries were prepared using the TruePrep™  
94 DNA Library Prep Kit V2 for Illumina (Vazyme). Briefly, the DNA sample was

95 fragmented and tagged with adapters using a single transposase enzymatic reaction,  
96 followed by amplification using an optimized, limited-cycle PCR protocol and indexing.  
97 Individual libraries were assessed on the QIAxcel Advanced Automatic nucleic acid  
98 analyzer, and quantitated through qPCR using KAPA SYBR FAST qPCR Kit. Illumina  
99 Next Generation Sequencing technology (HiSeq PE150) was used to generate a paired-  
100 end library of short read sequences (150nt) for each isolate. Sequence quality controls  
101 were performed using FastQC version 10-01-18 (Andrews, n.d.) and trimmed and refined  
102 using Fastx toolkit version 0.0.13 (Lab, n.d.). *De novo* assembly was performed using  
103 SPAdes version 3.13.1 (18). Scaffold generation and ordering were performed using  
104 MeDuSa version that was available on July 2018 and Mauve version 2.4.0, respectively  
105 (19, 20). Closely related genomes (NTUH-K2044 (Kp9), CP027602 (Kp10), HKUOPLC  
106 (Kp1-8, Kp11-22) from NCBI were identified using genome identity. Upon assembly and  
107 alignment of all ST2727 genomes, single nucleotide variations (SNV) were inferred using  
108 Parsnp tool from Harvest Suite version 1.1.2 using a reference Kp1 isolate genome (21).

### 109 **Genomic analysis**

110 Genes contributing to drug-resistance and virulence were detected using Kaptive  
111 version available on July 2018 and Kleborate version 0.3.0 (22, 23). VRprofile version  
112 2.0 was used to detect genes clusters characteristic of protein secretion systems of type 3  
113 (T3SS), type 4 (T4SS) or type 6 (T6SS) (24). The presence of genes encoding a type 2  
114 secretion system (T2SS) was detected by BLAST version 2.7.1, using as queries the  
115 known T2SS genes (25). Phylogenetic analysis was conducted using 3611 *Klebsiella*  
116 genomes downloaded from the NCBI database (downloaded on 20/06/2018) to find the  
117 closest related genomes to the novel strains (Data S1). Core genome alignment of  
118 *Klebsiella* genomes (including ST2727 isolates) was generated using Roary version  
119 3.11.2. Excluding poorly assembled genomes the final dataset constituted 3611 genomes  
120 comprising 3251 genes that were in at least 99% of the sequences (26). Phylogenetic  
121 relationships were estimated using the maximum likelihood (ML) method in RAxML  
122 version 8.2.12 (27) using the General Time Reversible (GTR) nucleotide substitution  
123 model with a gamma ( $\Gamma$ ) distribution of among-site rate. Branch support was estimated

124 using a ML bootstrap analysis with replicates ranging from 10 to >1000 replicates for the  
125 different datasets analysed.

126 Finally, to detect signatures of natural selection in the ST2727 outbreak samples,  
127 we used McDonald-Kreitman Test (MKT) implemented in the Rpackage PopGenome  
128 (28). MKT was calculated for the whole genome, and gene-wise. The MKT is the ratio  
129 (neutrality index,  $NI=(Pn/Ps)/(Dn/Ds)$ ) of the relation of nonsynonymous/synonymous  
130 mutations between strains ( $Pn/Ps$ ) and the relation of nonsynonymous/synonymous  
131 mutations within strains ( $Dn/Ds$ ). When this ratio is 1 it means that the same number of  
132 mutations are happening between and within strains, which suggests that there is not  
133 selective pressure or neutral selection occurring within strains. When the ratio is more  
134 than 1 ( $NI>1$ ) it means that  $Pn/Ps>Dn/Ds$ , which is characteristic of negative selective  
135 pressure occurring within strains. The opposite, a ration less than 1 ( $NI<1$ ), when  
136  $Pn/Ps<Dn/Ds$ , is characteristic of positive selection occurring within strains (29).

137 To confirm that the genome datasets contained sufficient genetic change between  
138 sampling times, necessary for the reconstruction of the time-scale of evolution, we used a  
139 root-to-tip regression of sampling years against genetic diversity in TempEst v1.5 (30),  
140 optimizing the best fit for the root to maximize the determination coefficient,  $R^2$ . The  
141 slope of the regression was positive, showing that the genomic data reflects temporal  
142 signal, so a molecular clock was estimated using a least-squares dating (LSD version 0.3)  
143 method (31) with 1000 samples for the confidence interval. The reliability of the analysis  
144 was confirmed using a permutation test in which the sampling years were randomized for  
145 100 replication, with a Zscore test (32). The nucleotide substitution rate per year and the  
146 branch lengths were used to determine the time of divergence of each node.

## 147 **RESULTS**

### 148 **Clinical scenario and diagnosis**

149 This study was initiated when outbreak status was called in a NICU due to a fatal  
150 case of a neonate patient presenting with symptoms of respiratory and gastrointestinal  
151 infections. Despite treatment with meropenem, vancomycin, cefoperazone and sulbactam,  
152 the neonate patient died from neonatal septicemia, septic shock, gastrointestinal  
153 hemorrhage and multiple organ dysfunction syndrome. Days after the fatal case, 20 more  
154 neonates were sampled along with an NICU staff member who presented symptoms of  
155 infection (Fig 1C). According to a Vitek II system (see Methods), blood and stool  
156 samples collected from the 21 neonates co-housed in the single-room NICU and the staff  
157 member were positive for *K. pneumoniae*. The neonates presented with a wide range of  
158 symptoms: three with respiratory and digestive symptoms, thirteen with respiratory  
159 disease such as dyspnea, severe asphyxia, tachypnea and/or cyanosis severe, one with  
160 digestive symptoms alone, while three presented with normal health (Table 1). The staff  
161 member presented with digestive symptoms including vomiting and severe diarrhea.  
162 MLST type classification using the *gapA*, *infB*, *mdh*, *pgi*, *phoE*, *rpoB* showed that 20/21  
163 neonate isolates were novel with a new MLST designation ST2727, whereas one neonate  
164 was of ST477 and the staff member was infected with a well-characterised hypervirulent  
165 type ST23, suggesting that the fatality was caused by the ST2727, and demonstrating that  
166 the staff member was not the cause of the event. Here, we sought to understand the  
167 carriage and genomic characteristics of ST2727 in the neonates and test the hypothesis of  
168 transmission in this closed scenario.

### 169 **Genomics-based evaluation of the NICU strains**

170 To determine the genomic characteristics of the bacteria recovered in this study,  
171 the complete genomes of all 20 ST2727 isolates were sequenced using a paired-end short  
172 read sequencing methodology. The lengths of the assembled genomes ranged from  
173 5,192,865 bp to 5,202,717 bp that encoded between 4706 and 5191 annotated genes  
174 (Table S2). The GC content of all genomes was 57%. Genomic analysis showed the



175 isolates exhibited high genomic similarity (0.018% sequence divergence), with 1,066  
176 single nucleotide variations (SNV) along their genomes corresponding to an average of  
177 one SNV every 2,392 bases. The variation observed among the ST2727 samples were at  
178 the lower range to the median divergence of 0–0.08% observed among the same MLST  
179 types (5).

180 Phylogenies generated from a core genome of 3611 globally sampled *Klebsiella*  
181 strains (Fig S1, [Data S1](#)), including isolates from the present study made evident that the  
182 ST2727 strains belong to *K. quasipneumoniae* subsp. *similipneumoniae* (KpIIB) (33)  
183 (Fig. 1A, Fig S2). The high similarity of the ST2727 strains suggests a clonal population.  
184 A root-to-tip regression of sampling dates and genetic distance of 54 KpIIB genomes  
185 sampled during 1994–2017, including the ST2727 genomes, showed a positive  
186 correlation (correlation coefficient: 0.64) between time and mutation, indicating that the  
187 dataset contained sufficient signal for the estimation of a molecular clock. We used the  
188 least-square dating method, to estimate an evolutionary rate for the KpIIB clade of  $4.596$   
189  $\times 10^{-05}$  nucleotide substitutions per site per year (nt subs/s/y) (95% CI of 4.180 to  $4.980 \times$   
190  $10^{-05}$ ). The ST2727 group exhibited a genomic divergence of >90 years (mean time of  
191 most recent common ancestor (TMRCA) 1926; 95% confidence interval (95% CI), 1917  
192 to 1933) to the most closely related isolate collected in 2016 from a patient from Thailand  
193 (KPPSTH03; MLST type ST929-1LV) (Fig 1A).

194 The TMRCA of all KpIIB lineages was 1874 (95%CI, 1861 – 1886), whereas, the  
195 mean TMRCA of ST2727 collected within the hospital was approximately 3 months prior  
196 to the first case Kp1 (mean TMRCA 2016.94, 95%CI 2016.88 – 2016.97) (Fig 1B). This  
197 showed a divergence time much greater than the duration of sampling across 22 days in  
198 February–March 2017 (Fig 1C). These results suggest that what was designated as an  
199 outbreak was instead the colonization of infants by a community of bacteria that were  
200 transmitted to the neonates during this period. Due to the variation present between  
201 ST2727 isolates, it is unlikely that the colonization occurred through direct transmission  
202 between one neonate to another. We suggest instead that the isolates were introduced to  
203 the hospital or the ward in the months prior to the outbreak and sustained within the

204 hospital during this period. The precise mechanism of colonization of the neonates is not  
 205 clear without comprehensive sampling of the built environment and the equipment used  
 206 in treatment and care of the neonates.

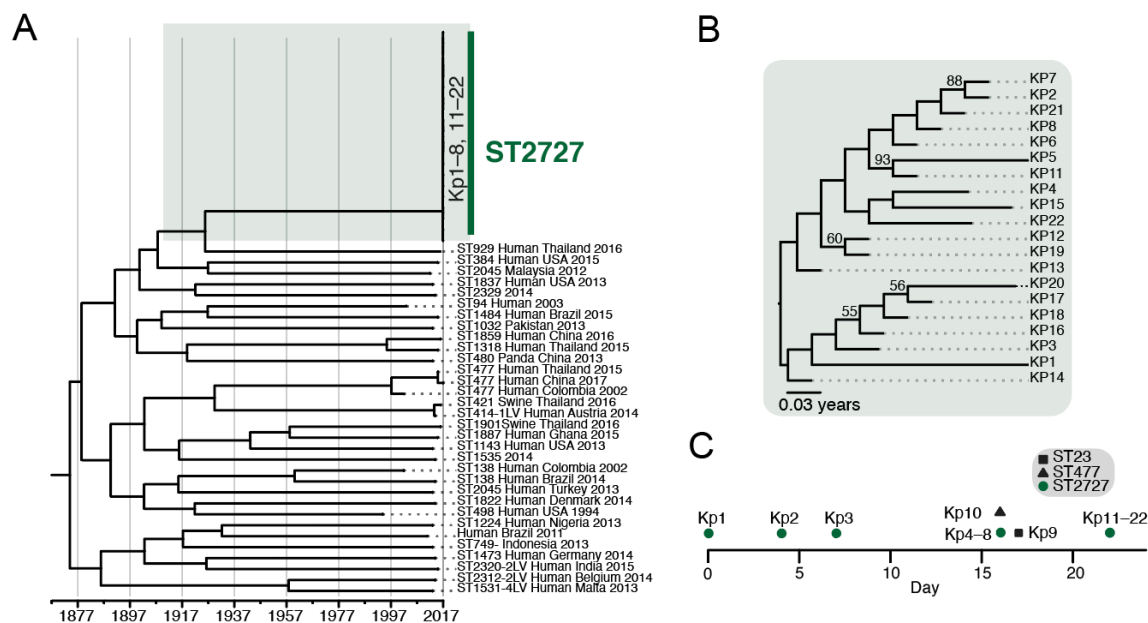

**Figure 1. Genomic epidemiology and timeline of *K. quasipneumoniae* subsp.**

***similipneumoniae* (KpIIB) sample collection in NICU.** (A) Evolutionary relationships and time-scale of evolution of 54 *K. quasipneumoniae* subsp. *similipneumoniae* (KpIIB) strains, and (B) ST2727 isolates detected in NICU during February and March 2017, generated using the least-square dating method. (C) Timeline of sample collection in NICU, where the calendar dates have been replaced by a timeline where the first sample was collected during day 0.

207 The core genome of ST2727 clade exhibited positive selection in comparison with  
 208 strains in the KpIIB clade (MKT, neutrality index: 0.35,  $NI < 1$ ), indicating that ST2727  
 209 isolates are under selection pressure. Gene-wise estimates of selection pressure in the  
 210 ST2727 clade in comparison with KpIIB strains showed that 21 genes were under  
 211 negative selection ( $NI > 1$ ) (Table S4), 10 were under positive selection (Table S5),  
 212 whereas, mutations in the remaining genes were either strongly deleterious or were under  
 213 neutral selection pressure (29). Many of these genes are fundamental to bacterial cell

214 biology and have been functionally characterized in various *K. pneumoniae* strains, and  
215 these functions can be expected to be conserved in *K. quasipneumoniae* subsp.  
216 *similipneumoniae* (KpIIB). Genes under purifying or negative selection included genes  
217 coding for transcriptional factors, metabolic enzymes, a structural protein, and proteins  
218 coding for active transport of solutes (Table S4). Transporter proteins found to be under  
219 purifying selection conform to a set of protein families: the ATP-Binding Cassette (ABC)  
220 transporters, Major Facilitator Superfamily (MFS) transporters, and antiporters and  
221 symporters. ABC transporter under negative selection were those designated as  
222 responsible for the transport of thiamine, nickel and carbohydrates, all of which are  
223 required for bacterial survival in nutrient rich environments (34). MFS transporters  
224 uptake nutrients from rich environments using chemiosmotic ion gradients (34), while  
225 antiporters and symporters maintain ion homeostasis for these and other functions (34).  
226 Taken together, this suggests that the ST2727 population has adapted for growth in a  
227 nutrient poor environment. Conversely, while the genes under positive selection also  
228 include some for active transportation of solutes (Table S5), these transporters are  
229 responsible for export of toxins and antibiotics as efflux systems. For example, genes  
230 coding for efflux RND transporter permease subunits (drug efflux) and HlyD toxin  
231 secretion (34). This reliance on drug-efflux is consistent too with the observation that the  
232 structural protein peptidoglycan glycosyltransferase/peptidoglycan DD-transpeptidase  
233 (PBP1A) encoded by the gene *mrcA*, was under negative selection: PBP1A catalyses the  
234 transglycosylation and transpeptidation of murein that is a major component of the cell  
235 wall, but it is also the target of beta-lactam antibiotics (34).

### 236 **O- and K- antigen serogroups of NICU isolates**

237 WGS analysis using Kaptive from Kleborate (22, 35) identified that ST2727  
238 strains have a KL55 capsular type (*wzi56*). O-typing of the surface lipopolysaccharide  
239 revealed all ST2727 were O3/O3a. This serotype has a strong adjuvant effect compared  
240 with other lipopolysaccharide types (36), but is a rarely reported serotype with no known

241 clinical impact (37). Genome sequence data revealed that all isolates were *wcaG*- (Fig  
 242 2A).

A

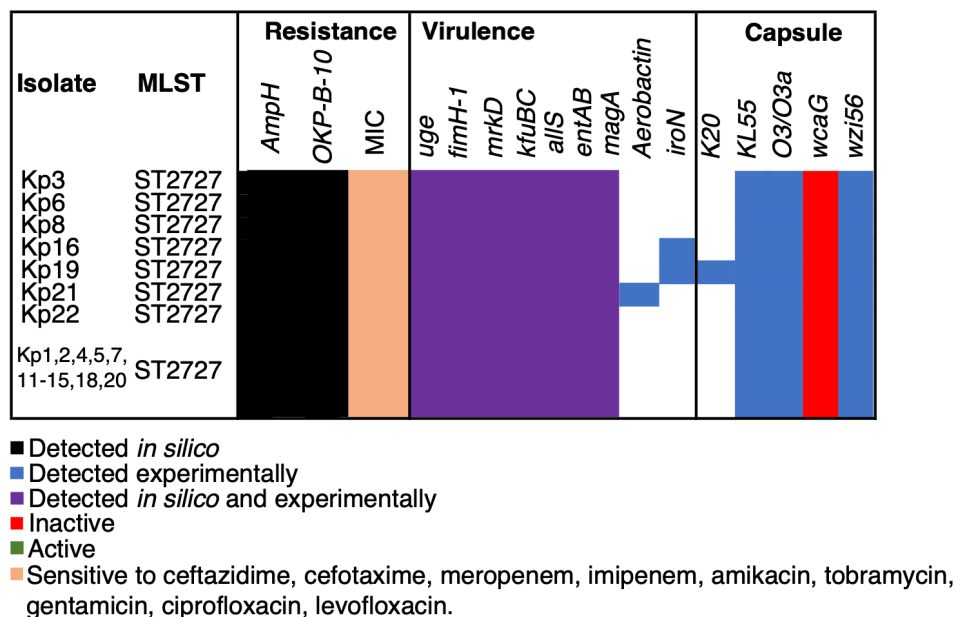

B

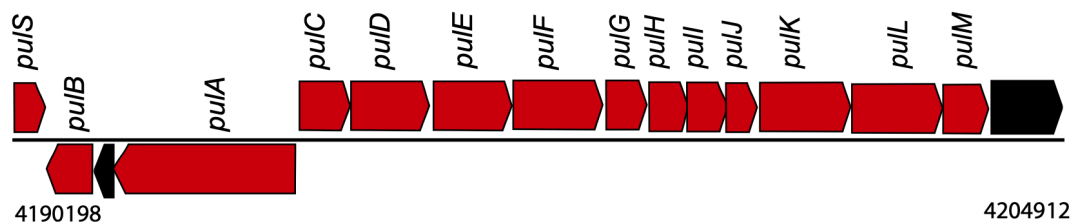

**Figure 2. Major resistance, virulence and capsular genes detected in ST2727. (A)**

Summary of genes contributing to drug-resistance, iron-acquisition and other virulence-enhancing features. (B) Genomic architecture of the T2SS cassette in ST2727.

### 243 Genes associated with virulence and antimicrobial resistance

244 All ST2727 isolates shared three genes considered diagnostic as virulence factors  
 245 (Fig 2A, Table S3): *uge* (uridine diphosphate galacturonate 4-epimerase), *fimH* (type 1  
 246 fimbrial adhesion) and *mrkD* (type 3 fimbrial adhesion). *Uge* is responsible for the  
 247 conversion of UDP-GlcA to UDP-GalA and is key for the production of polysaccharides  
 248 containing GalA residues, a feature which has been shown to promote colonization of

249 human tissues (38). Fimbriae are an important feature of *Klebsiella*, and the gene *fimH*  
250 encodes a well-conserved adhesin subunit that is found in around 90% of *Klebsiella*  
251 strains (39). This gene has high mobility within clones through horizontal transfer (39).  
252 The gene encoding *mrkD* is associated with “type III” fimbriae, important for adhesion to  
253 promote establishment of bacterial biofilms in harsh environments (40).

254 In terms of antimicrobial resistance, two genes encoding beta-lactamases were detected  
255 (Fig 2A, Table S3): the ubiquitous *ampH*, responsible for resistance to penicillin G,  
256 cefoxitin and cephalosporin C, and the Kp-IIB restricted *bla*OKP-B-10 (41).

## 257 **Secretion Systems**

258 Protein secretion systems are key components of virulence in many bacterial  
259 pathogens (42), and in *Klebsiella* the type 2 secretion system (T2SS) is the best  
260 characterized of these virulence determinants (43). *In silico* inspection of the genomes  
261 showed that all ST2727 isolates collected have a similar T2SS architecture, typically  
262 composed of *pulS* and *pulA-pulM* (44) (Fig 2B). HlyD, is a diagnostic component of the  
263 type 1 secretion system (T1SS), and was detected in the ST2727 strains (Table S5). Other  
264 common secretion systems (T3SS, T4SS, T5SS and T6SS) were not found in any of  
265 ST2727 isolates.

## 266 **Evolutionary relationship of ST2727 to globally isolated *Klebsiella* strains**

267 *Klebsiella quasipneumoniae* was previously considered of low clinical risk (3-5).  
268 Mapping of virulence and resistance phenotypes observed among *K. quasipneumoniae*  
269 subsp. *similipneumoniae* (KpIIB) and globally collected *Klebsiella* genomes showed that  
270 two KpIIB MLST types, ST1901 (GCF\_002248055.1) and ST2320 (GCF\_001729665.1)  
271 and a KPIII (*K. variicola*) type (ST981) (GCF\_001463685.1) (45) contained virulence  
272 markers, that were previously only observed among *K. pneumoniae* strains (22, 23). The  
273 ST1910 genome collected in Thailand in 2016 contained the virulence marker aerobactin  
274 (*iuc3*), whereas the ST2320 strain collected in India during 2015 can express aerobactin  
275 (*iuc1*), yerseniabactin (*ybt 9*; *ICEKp3*) and salmochelin (*iro1*), as well as producing a  
276 hypermucoidy phenotype (*rmpA\_4*, *rmpA2\_3*). The emergence of virulence markers  
277 among KPII genomes raises concerns as there has been a rise in documentation of

278 hospital-acquired infections caused by *K. quasipneumoniae* (5, 7). Also, Figure 3 shows  
 279 that ST2727 is closely related to ST498, a group that has been found to have resistance  
 280 genes including *aadB*, *sull*, *blaOKP-B-7*, and the genes *blaOXA-2* and *blaSHV-18* that  
 281 encode ESBL (8) (Fig. 3).

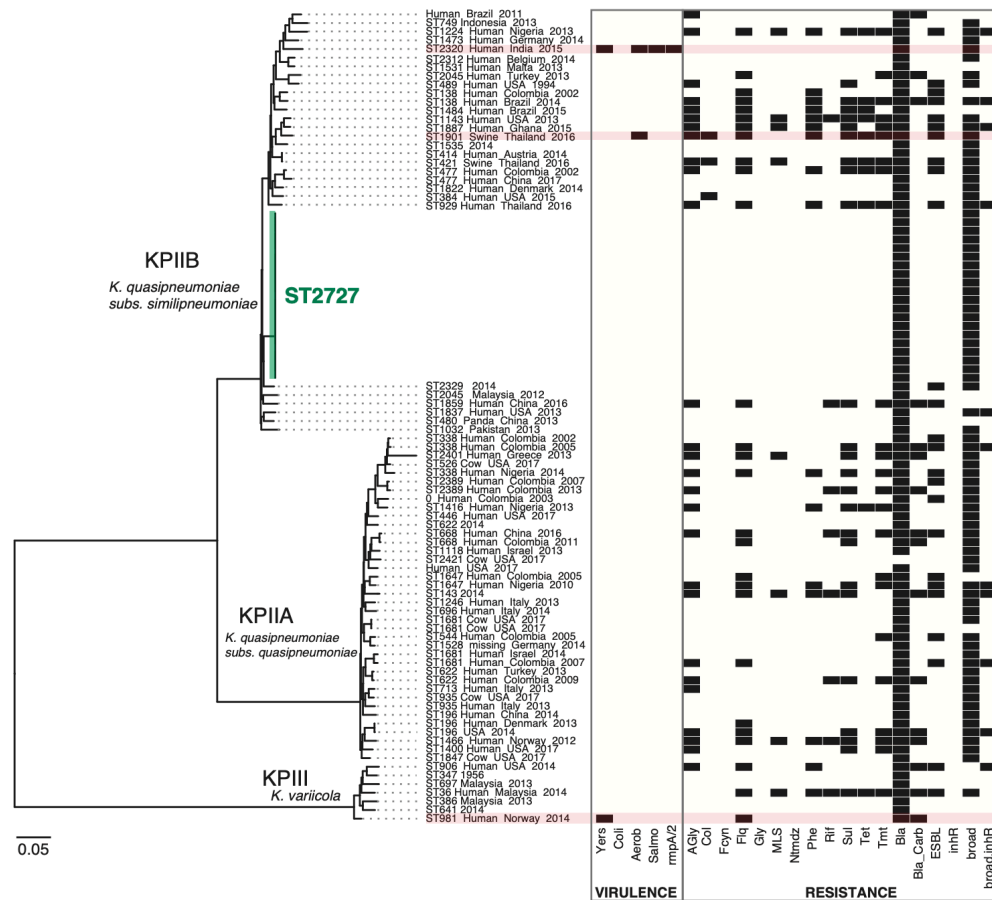

**Figure 3. Phylogenetic distribution of virulence and resistance genes among KPII and KPIII genomes.** The presence of virulent and resistance genes is shown in black. Virulent genes are grouped in categories: Yers (yersiniabactin), Coli (colibactin), Aerob (aerobactin), Salmo (Salmochelins) and *rmpA*, *rmpA\_2* (hypermucoic). Resistant genes are grouped in categories: Gly (glycopeptides), MLS (macrolides), Phe (phenicols), Rif (rifampin), Sul (sulphonamides), Tet (tetracyclines), Tmt (trimethoprim), Bla (beta-lactamases), Bla\_Carb (carbapenemase), ESBL (extended spectrum beta-lactamases), inhR (extended spectrum beta-lactamases with resistance to beta-lactamase inhibitors), broad (broad spectrum beta-lactamases), broad.inhR (broad spectrum beta-lactamases with resistance to beta-lactamase inhibitors). Virulent MLST types are highlighted in red.

## 282 DISCUSSION

283 The colonization of the neonate gut is a complex process with contributions from the  
284 mother's microbiome and environmental sources, that can not easily be disentangled (46-  
285 48). In this study, 21 neonates housed in a single room were sampled across 22 days for  
286 the carriage of *Klebsiella* in response to an outbreak-status event. It is clear from  
287 genomics data the hyper-virulent ST23 isolated from the staff member was an irrelevant  
288 coincidence to the sepsis event in the neonate patients. The only *Klebsiella* isolated from  
289 the sick neonates carried a previously unreported sequence type (ST2727), with core-  
290 genome phylogenies showing they belonged to *K. quasipneumoniae* subsp.  
291 *similipneumoniae* (33). Despite the availability of few KPIIB genomes, our analysis of 54  
292 available genomes including the 20 new ST2727 samples, showed positive correlation  
293 between genetic distances and date of sampling (30). This indicates that our dataset was  
294 adequate to show that the NICU samples had diverged months prior to the detection of  
295 the first case, and showing that ST2727 was not transmitted between patients during the  
296 outbreak. These results were further supported by a permutation test where the sampling  
297 dates were randomized (32, 49). Furthermore, the lower sampling of KPIIB genomes, as  
298 compared to the greatly sampled *K pneumoniae* genomes, would not have an effect on the  
299 estimation of the molecular clock for the outbreak samples because bacterial phylogenies  
300 in general show a large genetic distance between MLST types – signified by the long  
301 phylogenetic branch lengths between MLST types (star-shaped species level phylogeny),  
302 indicating that adequate sampling of closely related bacteria would have an improvement  
303 in estimates rather than greater sampling of highly divergent genomes within a bacterial  
304 species. Overall, this study suggests that a population of ST2727 with some sequence  
305 variability is likely endemic within the hospital environment, and that distinct members  
306 within this population have infected the neonates in their first days of life.

307 It is probable that ST2727 is under antibiotic selective pressure due to their  
308 prevalence in the hospital environment for the months prior to the events analysed here.  
309 This is further confirmed with a MKT indicating positive selective pressure ongoing for  
310 genes related with efflux systems that are a key part for the transport of toxic substances



311 as antibiotics. However, further investigation on evolutionary mechanism selecting for  
312 resistant genes and genes related with resistance mechanisms would need to be done in  
313 order to assert these findings. Previously, estimates of selection pressure on the genes  
314 encoding beta-lactamases in the KpI, KpII and KpIII clades have showed neutral  
315 selection of these genes (45). In agreement with this, we did not find either of the genes  
316 encoding beta-lactamases in ST2727 to be under natural selective pressure.

317 Although made highly unlikely, the data in this study cannot rule out a maternal  
318 contribution to the *Klebsiella* carriage, but we note that (i) 12/20 neonates were delivered  
319 via Caesarian section (Table 1) where maternal contribution to microflora should be  
320 inconsistent and minimal, and that (ii) ST2727 is probably not a dominant sequence type  
321 in the community as it has not been sampled previously, despite the hospital having more  
322 than 1500 *Klebsiella* isolates collected from adult patients over 15 years. We suggest that  
323 a substantial contribution to carriage comes from the endemic microflora in the NICU,  
324 with this specific built environment colonized by a population corresponding to ST2727.  
325 A suggestion for future analyses would be inclusion of more detailed samplings of the  
326 NICU environment, including the built environment itself and systematic sampling of  
327 staff members and visitors.

328 Previous analysis estimated that at least half of *Klebsiella* infections result from  
329 patients' own microbiota (50). That the neonate who died likely had a bowel perforation  
330 to initiate sepsis from a strain carried in his gut supports the contention that *Klebsiella*  
331 *quasipneumoniae* carriage contributes to the risk of infection in hospital environments.  
332 Thus, carriage of drug-resistant or hypervirulent clones of *Klebsiella*, including *K.*  
333 *quasipneumoniae* in the gut would be of great concern in people with lowered immune  
334 systems – such as neonates - or those with conditions requiring surgical treatment where  
335 bowel perforation is a risk factor (46). Our study highlights the importance of WGS for  
336 elucidating the transmission and carriage of hospital-resident bacterial populations, urges  
337 for the early identification and eradication of persistent strains that increase the rate of  
338 hospital-acquired infections.



## **FUNDING**

This work was supported by research grants from the National Natural Science Foundation of China (no. 81171614), the Health Department of Zhejiang Province of the People's Republic of China (no. 2011KYA106), the Zhejiang Provincial Program for the Cultivation of High-level Innovative Health Talents (no. 2012, 241) and Program Grant 1092262 from the National Health and Medical Research Council, Australia.

## **CONFLICTS OF INTEREST**

The authors declare that there are no conflicts of interest.

## **ETHICAL APPROVAL**

This study was approved by the Ethics Committee of the First Affiliated Hospital of Wenzhou Medical University (China).

## **ACKNOWLEDGEMENTS**

We thank Dr. Jiangning Song for his input in the early stages of this analysis.

## REFERENCES

1. Wyres KL, Holt KE. *Klebsiella pneumoniae* as a key trafficker of drug resistance genes from environmental to clinically important bacteria. *Curr Opin Microbiol.* 2018;45:131-9.
2. Zhan L, Wang S, Guo Y, Jin Y, Duan J, Hao Z, et al. Outbreak by Hypermucoviscous *Klebsiella pneumoniae* ST11 Isolates with Carbapenem Resistance in a Tertiary Hospital in China. *Frontiers in Cellular and Infection Microbiology.* 2017;7.
3. Long SW, Linson SE, Ojeda Saavedra M, Cantu C, Davis JJ, Brettin T, et al. Whole-Genome Sequencing of Human Clinical *Klebsiella pneumoniae* Isolates Reveals Misidentification and Misunderstandings of *Klebsiella pneumoniae*, *Klebsiella variicola*, and *Klebsiella quasipneumoniae*. *mSphere.* 2017;2(4).
4. Long SW, Olsen RJ, Eagar TN, Beres SB, Zhao P, Davis JJ, et al. Population Genomic Analysis of 1,777 Extended-Spectrum Beta-Lactamase-Producing *Klebsiella pneumoniae* Isolates, Houston, Texas: Unexpected Abundance of Clonal Group 307. *MBio.* 2017;8(3).
5. Holt KE, Wertheim H, Zadoks RN, Baker S, Whitehouse CA, Dance D, et al. Genomic analysis of diversity, population structure, virulence, and antimicrobial resistance in *Klebsiella pneumoniae*, an urgent threat to public health. *Proc Natl Acad Sci U S A.* 2015;112(27):E3574-81.
6. Blin C, Passet V, Touchon M, Rocha EPC, Brisse S. Metabolic diversity of the emerging pathogenic lineages of *Klebsiella pneumoniae*. *Environ Microbiol.* 2017;19(5):1881-98.
7. Ejaz H, Wang N, Wilksch JJ, Page AJ, Cao H, Gujran S, et al. Phylogenetic analysis of *Klebsiella pneumoniae* from hospitalized children, Pakistan. *Emerging Infectious Diseases.* 2017;23:1872-5.
8. Elliott AG, Ganesamoorthy D, Coin L, Cooper MA, Cao MD. Complete Genome Sequence of *Klebsiella quasipneumoniae* subsp. *similipneumoniae* Strain ATCC 700603. *Genome Announc.* 2016;4(3).
9. Maatallah M, Vading M, Kabir MH, Bakhrouf A, Kalin M, Naucier P, et al. *Klebsiella variicola* is a frequent cause of bloodstream infection in the stockholm area, and associated with higher mortality compared to *K. pneumoniae*. *PLoS One.* 2014;9(11):e113539.
10. Marisa NF, Ramos PIP, Marques de Carvalho F, Camargo DRA, de Fatima Morais Alves C, Loss de Morais G, et al. Comparative Genomic Analysis of a Clinical Isolate of *Klebsiella quasipneumoniae* subsp. *similipneumoniae*, a KPC-2 and OKP-B-6 Beta-Lactamases Producer Harboring Two Drug-Resistance Plasmids from Southeast Brazil. *Front Microbiol.* 2018;9:220.
11. Rodrigues C, Passet V, Rakotondrasoa A, Brisse S. Identification of *Klebsiella pneumoniae*, *Klebsiella quasipneumoniae*, *Klebsiella variicola* and Related Phylogroups by MALDI-TOF Mass Spectrometry. *Front Microbiol.* 2018;9:3000.
12. Lowe C, Willey B, O'Shaughnessy A, Lee W, Lum M, Pike K, et al. Outbreak of extended-spectrum beta-lactamase-producing *Klebsiella oxytoca* infections associated with contaminated handwashing sinks(1). *Emerg Infect Dis.* 2012;18(8):1242-7.
13. Chang FY, Chou MY. Comparison of pyogenic liver abscesses caused by *Klebsiella pneumoniae* and non-*K. pneumoniae* pathogens. *J Formos Med Assoc.* 1995;94(5):232-7.
14. Gu D, Dong N, Zheng Z, Lin D, Huang M, Wang L, et al. A fatal outbreak of ST11 carbapenem-resistant hypervirulent *Klebsiella pneumoniae* in a Chinese hospital: a molecular epidemiological study. *Lancet Infect Dis.* 2018;18(1):37-46.
15. World Medical A. World Medical Association Declaration of Helsinki: ethical principles for medical research involving human subjects. *JAMA.* 2013;310(20):2191-4.
16. Tenover FC, Arbeit RD, Goering RV, Mickelsen PA, Murray BE, Persing DH, et al. Interpreting chromosomal DNA restriction patterns produced by pulsed-field gel electrophoresis: criteria for bacterial strain typing. *J Clin Microbiol.* 1995;33(9):2233-9.
17. Diancourt L, Passet V, Verhoef J, Grimont PA, Brisse S. Multilocus sequence typing of *Klebsiella pneumoniae* nosocomial isolates. *J Clin Microbiol.* 2005;43(8):4178-82.
18. Bankevich A, Nurk S, Antipov D, Gurevich AA, Dvorkin M, Kulikov AS, et al. SPAdes: a new genome assembly algorithm and its applications to single-cell sequencing. *J Comput Biol.* 2012;19(5):455-77.

19. Bosi E, Donati B, Galardini M, Brunetti S, Sagot MF, Lio P, et al. MeDuSa: a multi-draft based scaffold. *Bioinformatics*. 2015;31(15):2443-51.
20. Darling AE, Mau B, Perna NT. progressiveMauve: multiple genome alignment with gene gain, loss and rearrangement. *PLoS One*. 2010;5(6):e11147.
21. Treangen TJ, Ondov BD, Koren S, Phillippy AM. The Harvest suite for rapid core-genome alignment and visualization of thousands of intraspecific microbial genomes. *Genome Biology*. 2014;15(11):524.
22. Wyres KL, Wick RR, Gorrie C, Jenney A, Follador R, Thomson NR, et al. Identification of *Klebsiella* capsule synthesis loci from whole genome data. *Microb Genom*. 2016;2(12):e000102.
23. Lam MM, Wyres KL, Duchene S, Wick RR, Judd LM, Gan Y-H, et al. Population genomics of hypervirulent *Klebsiella pneumoniae* clonal-group 23 reveals early emergence and rapid global dissemination. *Nature Communications*. 2018;9:2703.
24. Li J, Tai C, Deng Z, Zhong W, He Y, Ou HY. VRprofile: gene-cluster-detection-based profiling of virulence and antibiotic resistance traits encoded within genome sequences of pathogenic bacteria. *Brief Bioinform*. 2018;19(4):566-74.
25. Dunstan RA, Heinz E, Wijeyewickrema LC, Pike RN, Purcell AW, Evans TJ, et al. Assembly of the Type II Secretion System such as Found in *Vibrio cholerae* Depends on the Novel Pilotin AspS. *PLOS Pathogens*. 2013;9(1):e1003117.
26. Page AJ, Cummins CA, Hunt M, Wong VK, Reuter S, Holden MT, et al. Roary: rapid large-scale prokaryote pan genome analysis. *Bioinformatics*. 2015;31(22):3691-3.
27. Stamatakis A. RAxML version 8: a tool for phylogenetic analysis and post-analysis of large phylogenies. *Bioinformatics*. 2014;30(9):1312-3.
28. Pfeifer B. An introduction to the PopGenome package. *Cran-R*. 2015:1-18.
29. Stoletzki N, Eyre-Walker A. Estimation of the neutrality index. *Mol Biol Evol*. 2011;28(1):63-70.
30. Rambaut A, Lam TT, Max Carvalho L, Pybus OG. Exploring the temporal structure of heterochronous sequences using TempEst (formerly Path-O-Gen). *Virus Evol*. 2016;2(1):vew007.
31. To TH, Jung M, Lycett S, Gascuel O. Fast Dating Using Least-Squares Criteria and Algorithms. *Syst Biol*. 2016;65(1):82-97.
32. Duchene S, Duchene DA, Geoghegan JL, Dyson ZA, Hawkey J, Holt KE. Inferring demographic parameters in bacterial genomic data using Bayesian and hybrid phylogenetic methods. *BMC Evolutionary Biology*. 2018;18:1-11.
33. Brisse S, Passet V, Grimont PAD. Description of *Klebsiella quasipneumoniae* sp. nov., Isolated from human infections, With two subspecies, *Klebsiella quasipneumoniae* subsp. *quasipneumoniae* subsp. nov. and *Klebsiella quasipneumoniae* subsp. *similipneumoniae* subsp. nov., And demonstration th. *International Journal of Systematic and Evolutionary Microbiology*. 2014;64:3146-52.
34. Mitchell AL, Attwood TK, Babbitt PC, Blum M, Bork P, Bridge A, et al. InterPro in 2019: improving coverage, classification and access to protein sequence annotations. *Nucleic Acids Res*. 2019;47(D1):D351-D60.
35. Wick RR, Heinz E, Holt KE, Wyres KL. Kaptive Web: User-Friendly Capsule and Lipopolysaccharide Serotype Prediction for *Klebsiella* Genomes. *J Clin Microbiol*. 2018;56(6).
36. Kato N, Kido N, Ohta M, Naito S, Nakashima I. Adjuvant Activity of *Klebsiella* O3 Lipopolysaccharide: Comparative Study Using Defined Uniform Salt Forms. *Microbiology and Immunology*. 1984;28(6):659-66.
37. Rollenske T, Szijarto V, Lukasiewicz J, Guachalla LM, Stojkovic K, Hartl K, et al. Cross-specificity of protective human antibodies against *Klebsiella pneumoniae* LPS O-antigen. *Nat Immunol*. 2018;19(6):617-24.
38. Regue M, Hita B, Pique N, Izquierdo L, Merino S, Fresno S, et al. A gene, *uge*, is essential for *Klebsiella pneumoniae* virulence. *Infect Immun*. 2004;72(1):54-61.
39. Stahlhut SG, Chattopadhyay S, Struve C, Weissman SJ, Aprikian P, Libby SJ, et al. Population variability of the FimH type 1 fimbrial adhesin in *klebsiella pneumoniae*. *Journal of Bacteriology*. 2009;191:1941-50.

40. Wilksch JJ, Yang J, Clements A, Gabbe JL, Short KR, Cao H, et al. MrkH, a novel c-di-GMP-dependent transcriptional activator, controls *Klebsiella pneumoniae* biofilm formation by regulating type 3 fimbriae expression. *PLoS Pathog.* 2011;7(8):e1002204.
41. Henderson TA, Young KD, Denome SA, Elf PK. AmpC and AmpH, proteins related to the class C beta-lactamases, bind penicillin and contribute to the normal morphology of *Escherichia coli*. *J Bacteriol.* 1997;179(19):6112-21.
42. Gunasinghe SD, Webb CT, Elgass KD, Hay ID, Lithgow T. Super-Resolution Imaging of Protein Secretion Systems and the Cell Surface of Gram-Negative Bacteria. *Front Cell Infect Microbiol.* 2017;7:220.
43. Cianciotto NP, White RC. The expanding role of type II secretion in bacterial pathogenesis and beyond. *Infection and Immunity.* 2017;85:1-17.
44. Nivaskumar M, Francetic O. Type II secretion system: A magic beanstalk or a protein escalator. *Biochimica et Biophysica Acta (BBA) - Molecular Cell Research.* 2014;1843(8):1568-77.
45. Samuelsen O, Overballe-Petersen S, Bjornholt JV, Brisse S, Doumith M, Woodford N, et al. Molecular and epidemiological characterization of carbapenemase-producing Enterobacteriaceae in Norway, 2007 to 2014. *PLoS One.* 2017;12(11):e0187832.
46. Raveh-Sadka T, Thomas BC, Singh A, Firek B, Brooks B, Castelle CJ, et al. Gut bacteria are rarely shared by co-hospitalized premature infants, regardless of necrotizing enterocolitis development. *Elife.* 2015;4.
47. Brooks B, Olm MR, Firek BA, Baker R, Thomas BC, Morowitz MJ, et al. Strain-resolved analysis of hospital rooms and infants reveals overlap between the human and room microbiome. *Nat Commun.* 2017;8(1):1814.
48. Yassour M, Jason E, Hogstrom LJ, Arthur TD, Tripathi S, Siljander H, et al. Strain-Level Analysis of Mother-to-Child Bacterial Transmission during the First Few Months of Life. *Cell Host & Microbe.* 2018;24(1):146-54.e4.
49. Mir D, Jung M, Delatorre E, Vidal N, Peeters M, Bello G. Phylodynamics of the major HIV-1 CRF02\_AG African lineages and its global dissemination. *Infect Genet Evol.* 2016;46:190-9.
50. Gorrie CL, Mirceta M, Wick RR, Edwards DJ, Thomson NR, Strugnell RA, et al. Gastrointestinal Carriage Is a Major Reservoir of *Klebsiella pneumoniae* Infection in Intensive Care Patients. *Clin Infect Dis.* 2017;65(2):208-15.

**Table 1.** Patient and *Klebsiella pneumoniae* strains.

| Sample id | MLST <sup>1</sup> | Patient | Birth    | Symptoms <sup>2</sup>  | Antibiotics | Invasive procedure |
|-----------|-------------------|---------|----------|------------------------|-------------|--------------------|
| KP1       | ST2727            | Neonate | vaginal  | Digestive, Respiratory | yes         | Yes                |
| KP2       | ST2727            | Neonate | cesarean | Digestive, Respiratory | yes         | Yes                |
| KP3       | ST2727            | Neonate | cesarean | Digestive, Respiratory | yes         | Yes                |
| KP4       | ST2727            | Neonate | vaginal  | Respiratory            | no          | Yes                |
| KP5       | ST2727            | Neonate | vaginal  | Respiratory            | no          | Yes                |
| KP6       | ST2727            | Neonate | cesarean | Respiratory            | yes         | Yes                |
| KP7       | ST2727            | Neonate | cesarean | Respiratory            | yes         | Yes                |
| KP8       | ST2727            | Neonate | cesarean | Respiratory            | no          | No                 |
| KP9       | ST23              | Staff   | N/A      | Digestive              | -           | -                  |
| KP10      | ST477             | Neonate | vaginal  | Digestive              | yes         | No                 |
| KP11      | ST2727            | Neonate | cesarean | Respiratory            | yes         | Yes                |
| KP12      | ST2727            | Neonate | vaginal  | Respiratory            | yes         | No                 |
| KP13      | ST2727            | Neonate | cesarean | Asymptomatic           | no          | no                 |
| KP14      | ST2727            | Neonate | cesarean | Respiratory            | yes         | Yes                |
| KP15      | ST2727            | Neonate | cesarean | Respiratory            | no          | No                 |
| KP16      | ST2727            | Neonate | vaginal  | Respiratory            | no          | Yes                |
| KP17      | ST2727            | Neonate | cesarean | Respiratory            | yes         | Yes                |
| KP18      | ST2727            | Neonate | vaginal  | Noninfection           | no          | Yes                |
| KP19      | ST2727            | Neonate | vaginal  | Asymptomatic           | no          | No                 |
| KP20      | ST2727            | Neonate | vaginal  | Respiratory            | yes         | Yes                |
| KP21      | ST2727            | Neonate | cesarean | Respiratory            | yes         | Yes                |
| KP22      | ST2727            | Neonate | cesarean | Asymptomatic           | no          | No                 |

<sup>1</sup>Multilocus Sequence Typing. <sup>2</sup> Symptoms are classified depending of what type of infection they are related to, “noninfections” suggests the patient has symptoms related to other diseases that are non-infectious disease for example symptoms related with cardio-respiratory chronic diseases, “Asymptomatic” refers to no symptoms at all. “Respiratory” and “Digestive” refers to symptoms related to respiratory infections and digestive infections, respectively.

## FIGURE LEGENDS

### **Figure 1. Genomic epidemiology and timeline of *K. quasipneumoniae* subsp.**

***similipneumoniae* (KpIIB) sample collection in NICU.** (A) Evolutionary relationships and time-scale of evolution of 54 *K. quasipneumoniae* subsp. *similipneumoniae* (KpIIB) strains, and (B) ST2727 isolates detected in NICU during February and March 2017, generated using the least-square dating method. (C) Timeline of sample collection in NICU, where the calendar dates have been replaced by a timeline where the first sample was collected during day 0.

### **Figure 2. Major resistance, virulence and capsular genes detected in ST2727.** (A)

Summary of genes contributing to drug-resistance, iron-acquisition and other virulence-enhancing features. (B) Genomic architecture of the T2SS cassette in ST2727.

### **Figure 3. Phylogenetic distribution of virulence and resistance genes among KPII and KPIII genomes.**

The presence of virulent and resistance genes is shown in black. Virulent genes are grouped in categories: Yers (yersiniabactin), Coli (colibactin), Aerob (aerobactin), Salmo (Salmochelin) and *rmpA*, *rmpA\_2* (hypermucoid). Resistant genes are grouped in categories: Gly (glycopeptides), MLS (macrolides), Phe (phenicols), Rif (rifampin), Sul (sulphonamides), Tet (tetracyclines), Tmt (trimethoprim), Bla (beta-lactamases), Bla\_Carb (carbapenemase), ESBL (extended spectrum beta-lactamases), inhR (extended spectrum beta-lactamases with resistance to beta-lactamase inhibitors), broad (broad spectrum beta-lactamases), broad.inhR (broad spectrum beta-lactamases with resistance to beta-lactamase inhibitors). Virulent MLST types are highlighted in red.
